# Supplementary material
Source: MDPI journal article supplement (https://www.mdpi.com/2075-163X/12/3/298)
Supplement: s1 [file s1 › Figure S1.pdf]

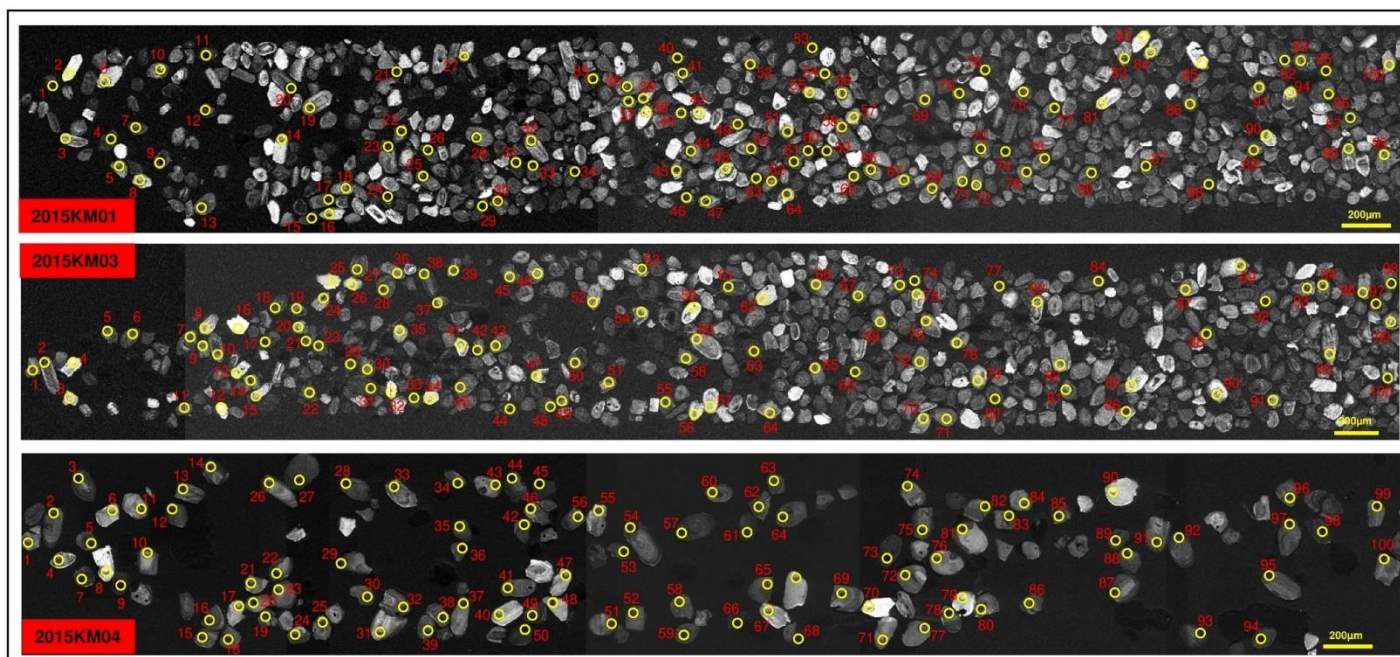

**Figure S1.** CL images of the studied samples of the Kamlial Formation, Kashmir, Northwestern Himalaya, Pakistan.
