# Supplementary material
Source: MDPI journal article supplement (https://www.mdpi.com/2075-163X/12/3/298)
Supplement: s1 [file s1 › Table S1.xls]

## Sheet: U-Pb ages
Table-S1. U-Pb isotopic analysis of detrital zircons.
Analysis	CORRECTED RATIOS											CORRECTED AGES (Ma)
	207Pb/206Pb	1σ	207Pb/235U	1σ	206Pb/238U	1σ	208Pb/232Th	1σ	rr	238U/232Th	1σ	207Pb/206Pb	1σ	207Pb/235U	1σ	206Pb/238U	1σ	208Pb/232Th	1σ	Final age	1σ	Concordant Ratio
Kamlial Formation
2015KM1-001	0.0471	0.0215	0.09538	0.04343	0.01471	0.00053	0.00492	0.00077	0.9	1.94	0.02	54	710	93	40	94	3	99	15	94	3	98.9362
2015KM1-002	0.06256	0.00193	0.97012	0.02747	0.11246	0.00138	0.03456	0.00038	0.88	6.67	0.07	693	67	689	14	687	8	687	7	687	8	100.291
2015KM1-003	0.06019	0.00106	0.74976	0.01324	0.0905	0.00101	0.02868	0.00037	0.9	3.29	0.03	610	20	568	8	558	6	572	7	558	6	101.792
2015KM1-004	0.0552	0.00112	0.50572	0.01018	0.06655	0.00076	0.02199	0.00039	0.9	5.48	0.05	420	25	416	7	415	5	440	8	415	5	100.241
2015KM1-005	0.04802	0.02747	0.07104	0.04053	0.01075	0.00046	9e-05	3e-05	0.9	0.06	0.01	100	922	70	38	69	3	1.8	0.6	69	3	101.449
2015KM1-006	0.06902	0.00259	1.347	0.04974	0.14177	0.00201	0.04353	0.00112	0.9	2.41	0.02	899	53	866	22	855	11	861	22	855	11	101.287
2015KM1-007	0.05665	0.0024	0.61238	0.02565	0.07851	0.00106	0.02361	0.00032	0.9	0.68	0.01	478	69	485	16	487	6	472	6	487	6	99.5893
2015KM1-008	0.06516	0.00134	1.19959	0.02444	0.13371	0.00154	0.04285	0.00077	0.9	4.49	0.04	780	24	800	11	809	9	848	15	809	9	98.8875
2015KM1-009	0.06496	0.00208	1.14906	0.03633	0.12847	0.00168	0.03734	0.00073	0.9	1.91	0.02	773	44	777	17	779	10	741	14	779	10	99.7433
2015KM1-010	0.19752	0.00271	14.1061	0.19793	0.51865	0.00615	0.12954	0.00165	0.9	1.5	0.02	2806	10	2757	13	2693	26	2462	30	2806	10	104.196
2015KM1-011	0.06894	0.00144	1.39602	0.02898	0.14704	0.00171	0.04612	0.0011	0.9	6.84	0.07	897	24	887	12	884	10	911	21	884	10	100.339
2015KM1-012	0.06428	0.00147	1.19205	0.02695	0.13464	0.00159	0.03195	0.00053	0.9	2.24	0.02	751	28	797	12	814	9	636	10	814	9	97.9115
2015KM1-013	0.07291	0.00176	1.53521	0.03661	0.15288	0.00185	0.0433	0.00067	0.9	1.81	0.02	1011	29	945	15	917	10	857	13	917	10	103.053
2015KM1-014	0.06555	0.00174	1.22694	0.03209	0.13588	0.00168	0.03688	0.00054	0.9	1.32	0.01	792	34	813	15	821	10	732	11	821	10	99.0256
2015KM1-015	0.06755	0.00111	1.44309	0.02382	0.15508	0.00172	0.04404	0.00066	0.9	4.41	0.04	855	17	907	10	929	10	871	13	929	10	97.6319
2015KM1-016	0.07649	0.00167	2.02059	0.04377	0.19177	0.00229	0.05171	0.00067	0.9	1.29	0.01	1108	25	1122	15	1131	12	1019	13	1108	25	97.9664
2015KM1-017	0.15853	0.00352	9.53304	0.21125	0.43649	0.00626	0.10853	0.00271	0.9	2.13	0.02	2440	19	2391	20	2335	28	2083	49	2440	19	104.497
2015KM1-018	0.06195	0.00158	0.85555	0.02159	0.10024	0.00121	0.02886	0.00045	0.9	1.79	0.02	672	33	628	12	616	7	575	9	616	7	101.948
2015KM1-019	0.05431	0.00069	0.4962	0.00644	0.06631	0.0007	0.02293	0.00069	0.9	69.33	0.69	384	13	409	4	414	4	458	14	414	4	98.7923
2015KM1-020	0.10818	0.00159	4.37868	0.06465	0.29376	0.00331	0.07778	0.00111	0.9	3.19	0.03	1769	13	1708	12	1660	16	1514	21	1769	13	106.566
2015KM1-021	0.05478	0.00103	0.52475	0.00986	0.06951	0.00077	0.0214	0.00058	0.9	14.89	0.15	403	23	428	7	433	5	428	11	433	5	98.8453
2015KM1-022	0.05596	0.00762	0.58397	0.07912	0.07572	0.00145	0.02476	0.00067	0.9	0.69	0.01	451	270	467	51	471	9	494	13	471	9	99.1507
2015KM1-023	0.06351	0.00145	0.98483	0.02232	0.11251	0.00131	0.03781	0.00083	0.9	5.65	0.06	725	29	696	11	687	8	750	16	687	8	101.31
2015KM1-024	0.06749	0.00129	1.35427	0.02573	0.1456	0.00165	0.04116	0.00053	0.9	2.02	0.02	853	21	869	11	876	9	815	10	876	9	99.2009
2015KM1-025	0.05967	0.00242	0.7035	0.02806	0.08554	0.00119	0.0246	0.00044	0.9	1.06	0.01	592	62	541	17	529	7	491	9	529	7	102.268
2015KM1-026	0.06479	0.00295	0.93285	0.0418	0.10445	0.00153	0.06359	0.00321	0.9	11.43	0.11	768	70	669	22	640	9	1246	61	640	9	104.531
2015KM1-027	0.07978	0.00198	2.04043	0.05003	0.18553	0.00231	0.05445	0.00093	0.9	1.86	0.02	1192	29	1129	17	1097	13	1072	18	1192	29	108.66
2015KM1-028	0.04696	0.03431	0.06947	0.05051	0.01073	0.0008	0.00444	0.00064	0.9	1.17	0.01	47	1015	68	48	69	5	90	13	69	5	98.5507
2015KM1-029	0.04779	0.01549	0.05143	0.01653	0.00781	0.00034	0.002	0.00019	0.9	1.05	0.01	89	471	51	16	50	2	40	4	50	2	102
2015KM1-030	0.06472	0.00292	1.05529	0.04674	0.11828	0.0018	0.03163	0.00045	0.9	0.41	0.01	765	68	731	23	721	10	629	9	721	10	101.387
2015KM1-31	0.11213	0.00129	5.09096	0.05964	0.32929	0.00349	0.08568	0.00105	0.9	6.81	0.07	1834	9	1835	10	1835	17	1662	20	1834	9	99.9455
2015KM1-32	0.04606	0.0222	0.07528	0.03618	0.01185	0.00045	0.00605	0.00041	0.9	1.17	0.01	1	747	74	34	76	3	122	8	76	3	97.3684
2015KM1-33	0.05668	0.0015	0.60416	0.01446	0.0773	0.00086	0.02403	0.00025	0.88	5.21	0.05	479	60	480	9	480	5	480	5	480	5	100
2015KM1-34	0.05675	0.00223	0.54111	0.02095	0.06914	0.0009	0.01515	0.00119	0.9	7.83	0.08	482	62	439	14	431	5	304	24	431	5	101.856
2015KM1-35	0.05647	0.00102	0.55638	0.00997	0.07145	0.00078	0.02788	0.00112	0.9	40	0.4	471	21	449	7	445	5	556	22	445	5	100.899
2015KM1-36	0.05025	0.07307	0.12575	0.18241	0.01815	0.0019	0.01282	0.00339	0.9	1.77	0.02	207	1507	120	165	116	12	257	68	116	12	103.448
2015KM1-37	0.0707	0.00203	1.58642	0.04486	0.1627	0.00207	0.0469	0.00102	0.9	2.55	0.03	949	37	965	18	972	11	926	20	972	11	99.2798
2015KM1-38	0.05744	0.00364	0.62995	0.03931	0.07952	0.00134	0.0219	0.00047	0.9	0.74	0.01	508	108	496	24	493	8	438	9	493	8	100.609
2015KM1-39	0.06021	0.00147	0.75546	0.01819	0.09097	0.00107	0.07207	0.00372	0.9	54.24	0.54	611	32	571	11	561	6	1407	70	561	6	101.783
2015KM1-40	0.05866	0.00407	0.59005	0.04026	0.07294	0.00132	0.01861	0.00042	0.9	0.6	0.01	555	118	471	26	454	8	373	8	454	8	103.744
2015KM1-041	0.05845	0.00858	0.695	0.10091	0.0862	0.00236	0.02626	0.00106	0.9	0.81	0.01	547	275	536	60	533	14	524	21	533	14	100.563
2015KM1-042	0.05068	0.01155	0.11849	0.0268	0.01695	0.00053	0.00585	0.00042	0.9	1.68	0.02	226	371	114	24	108	3	118	8	108	3	105.556
2015KM1-043	0.0701	0.00417	1.26104	0.07362	0.13041	0.00242	0.03595	0.00109	0.9	1.21	0.01	931	89	828	33	790	14	714	21	790	14	104.81
2015KM1-044	0.06815	0.00168	1.25667	0.03053	0.13367	0.0016	0.0388	0.00077	0.9	3.1	0.03	873	31	826	14	809	9	769	15	809	9	102.101
2015KM1-045	0.07027	0.0024	1.37357	0.04363	0.14177	0.00178	0.043	0.00047	0.88	4.16	0.04	936	72	878	19	855	10	851	9	855	10	102.69
2015KM1-046	0.04778	0.0033	0.02484	0.0017	0.00377	6e-05	0.00121	4e-05	0.9	2.29	0.02	88	121	25	2	24.3	0.4	24.4	0.8	24.3	0.4	102.881
2015KM1-047	0.07015	0.00132	1.44389	0.02685	0.14918	0.00167	0.0435	0.00053	0.9	1.75	0.02	933	21	907	11	896	9	861	10	896	9	101.228
2015KM1-048	0.0712	0.00238	1.4167	0.04653	0.14422	0.00195	0.0446	0.0013	0.9	3.61	0.04	963	45	896	20	868	11	882	25	868	11	103.226
2015KM1-050	0.05582	0.00167	0.52193	0.01538	0.06777	0.00082	0.02497	0.00084	0.9	9.41	0.09	445	44	426	10	423	5	499	17	423	5	100.709
2015KM1-051	0.06541	0.01394	1.03945	0.2192	0.11517	0.00448	0.03606	0.00231	0.9	0.94	0.01	788	394	724	109	703	26	716	45	703	26	102.987
2015KM1-052	0.06096	0.00293	0.82091	0.03885	0.09759	0.00144	0.02988	0.00082	0.9	2	0.02	638	76	609	22	600	8	595	16	600	8	101.5
2015KM1-053	0.14429	0.00349	7.66566	0.18349	0.38499	0.00554	0.09684	0.00198	0.9	1.33	0.01	2279	22	2193	22	2100	26	1868	36	2279	22	108.524
2015KM1-054	0.06832	0.00122	1.1376	0.02006	0.12066	0.00132	0.03854	0.00196	0.9	44.11	0.44	878	19	771	10	734	8	764	38	734	8	105.041
2015KM1-055	0.05986	0.00716	0.6724	0.07946	0.0814	0.00191	0.02521	0.00074	0.9	0.62	0.01	599	220	522	48	504	11	503	15	504	11	103.571
2015KM1-056	0.07721	0.00455	1.74412	0.10066	0.16368	0.00317	0.04707	0.00178	0.9	1.74	0.02	1127	84	1025	37	977	18	930	34	977	18	104.913
2015KM1-057	0.06983	0.00133	1.49096	0.02812	0.15472	0.00173	0.05767	0.00263	0.9	32.53	0.33	923	21	927	11	927	10	1133	50	927	10	100
2015KM1-058	0.13516	0.00213	6.88658	0.10896	0.36919	0.00429	0.10403	0.00137	0.9	1.63	0.02	2166	13	2097	14	2026	20	2000	25	2166	13	106.91
2015KM1-059	0.04857	0.02717	0.09572	0.05339	0.01428	0.00065	0.00491	0.00107	0.9	2.71	0.03	127	895	93	49	91	4	99	22	91	4	102.198
2015KM1-060	0.055	0.00093	0.52179	0.00879	0.06874	0.00073	0.02274	0.00058	0.9	19.82	0.2	412	20	426	6	429	4	454	11	429	4	99.3007
2015KM1-062	0.05195	0.01097	0.11274	0.02359	0.01572	0.00049	0.00479	0.00033	0.9	1.38	0.01	283	357	108	22	101	3	97	7	101	3	106.931
2015KM1-063	0.069	0.00333	1.25182	0.05915	0.13144	0.00211	0.03727	0.00097	0.9	1.35	0.01	899	71	824	27	796	12	740	19	796	12	103.518
2015KM1-064	0.05455	0.00141	0.53827	0.01367	0.07149	0.00083	0.02322	0.0006	0.9	7.13	0.07	394	36	437	9	445	5	464	12	445	5	98.2022
2015KM1-065	0.04793	0.01174	0.09759	0.02379	0.01475	0.00039	0.00663	0.00058	0.9	3.17	0.03	96	381	95	22	94	2	134	12	94	2	101.064
2015KM1-066	0.07016	0.00181	1.41077	0.0359	0.14567	0.00175	0.04378	0.00073	0.9	1.92	0.02	933	33	893	15	877	10	866	14	877	10	101.824
2015KM1-067	0.07322	0.00389	1.46649	0.07672	0.14511	0.00238	0.04866	0.00226	0.9	3.81	0.04	1020	79	917	32	873	13	960	44	873	13	105.04
2015KM1-068	0.04684	0.00381	0.03957	0.00317	0.00612	0.00011	0.00235	8e-05	0.9	1.81	0.02	41	142	39	3	39.3	0.7	47	2	39.3	0.7	99.2366
2015KM1-069	0.04643	0.01862	0.04801	0.01919	0.00749	0.00026	0.00274	0.00017	0.9	1.01	0.01	20	602	48	19	48	2	55	3	48	2	100
2015KM1-070	0.05864	0.00586	0.61217	0.06053	0.07562	0.00148	0.02569	0.00068	0.9	0.84	0.01	554	184	485	38	470	9	513	13	470	9	103.191
2015KM1-071	0.06959	0.00226	1.43511	0.04332	0.14957	0.0018	0.04542	0.00048	0.88	4	0.04	916	68	904	18	899	10	898	9	899	10	100.556
2015KM1-072	0.05014	0.01474	0.09941	0.02898	0.01436	0.00057	0.00506	0.00046	0.9	1.56	0.02	201	454	96	27	92	4	102	9	92	4	104.348
2015KM1-073	0.06357	0.00606	0.70183	0.06582	0.07997	0.00182	0.02579	0.00064	0.9	0.5	0.01	727	162	540	39	496	11	515	13	496	11	108.871
2015KM1-074	0.04811	0.01042	0.06569	0.01408	0.00989	0.00033	0.00326	0.00017	0.9	0.92	0.01	105	333	65	13	63	2	66	3	63	2	103.175
2015KM1-075	0.05625	0.00352	0.59044	0.03652	0.07604	0.00116	0.02847	0.00056	0.9	1.06	0.01	462	110	471	23	472	7	567	11	472	7	99.7881
2015KM1-076	0.07339	0.00301	1.84138	0.07468	0.18176	0.00243	0.0139	0.00312	0.9	5.52	0.06	1025	60	1060	27	1077	13	279	62	1025	60	95.1718
2015KM1-077	0.07155	0.0016	1.59968	0.03528	0.16197	0.00186	0.05435	0.00078	0.9	1.9	0.02	973	27	970	14	968	10	1070	15	968	10	100.207
2015KM1-078	0.06405	0.00275	0.87458	0.03691	0.09891	0.00138	0.03741	0.00107	0.9	3.28	0.03	743	66	638	20	608	8	742	21	608	8	104.934
2015KM1-079	0.05672	0.0017	0.56124	0.0165	0.07169	0.00086	0.02336	0.00031	0.9	0.96	0.01	481	44	452	11	446	5	467	6	446	5	101.345
2015KM1-080	0.05678	0.00326	0.61284	0.03481	0.07819	0.0011	0.02765	0.00083	0.9	2.17	0.02	483	101	485	22	485	7	551	16	485	7	100
2015KM1-081	0.23966	0.00598	19.7184	0.39927	0.59674	0.00872	0.16002	0.00231	0.89	4.31	0.04	3118	41	3078	20	3017	35	3000	40	3118	41	103.348
2015KM1-082	0.06976	0.00137	1.52856	0.02951	0.15872	0.00175	0.05523	0.00534	0.9	85.77	0.86	921	22	942	12	950	10	1087	102	950	10	99.1579
2015KM1-083	0.05801	0.00234	0.5351	0.02129	0.06682	0.00086	0.0282	0.00137	0.9	12.66	0.13	530	64	435	14	417	5	562	27	417	5	104.317
2015KM1-084	0.06949	0.00145	1.45412	0.02611	0.15176	0.00161	0.04609	0.00048	0.88	10.71	0.11	913	44	912	11	911	9	911	9	911	9	100.11
2015KM1-085	0.14604	0.00448	8.25923	0.22444	0.41018	0.00586	0.1153	0.00155	0.9	2.33	0.02	2300	54	2260	25	2216	27	2206	28	2300	54	103.791
2015KM1-086	0.05858	0.00153	0.60568	0.01553	0.0749	0.00086	0.02806	0.00051	0.9	3.54	0.04	552	36	481	10	466	5	559	10	466	5	103.219
2015KM1-087	0.05977	0.00155	0.6736	0.01722	0.08163	0.00093	0.02237	0.00309	0.9	61.15	0.61	595	36	523	10	506	6	447	61	506	6	103.36
2015KM1-088	0.06167	0.00477	0.68394	0.0523	0.08034	0.00138	0.0262	0.00065	0.9	0.99	0.01	663	135	529	32	498	8	523	13	498	8	106.225
2015KM1-089	0.06459	0.00295	0.91819	0.04115	0.10297	0.0015	0.03404	0.0009	0.9	2.16	0.02	761	70	661	22	632	9	677	18	632	9	104.589
2015KM1-090	0.04842	0.03869	0.09317	0.07424	0.01394	0.00087	0.00446	0.0017	0.9	2.97	0.03	120	1125	90	69	89	6	90	34	89	6	101.124
2015KM1-091	0.10438	0.00698	4.03775	0.26641	0.28022	0.00603	0.08508	0.00233	0.9	0.77	0.01	1703	90	1642	54	1592	30	1650	43	1703	90	106.972
2015KM1-092	0.07519	0.00233	1.67413	0.05095	0.1613	0.00203	0.04924	0.00227	0.9	7.66	0.08	1074	41	999	19	964	11	972	44	964	11	103.631
2015KM1-093	0.04674	0.04176	0.0674	0.0601	0.01045	0.00058	0.0034	0.00057	0.9	1.16	0.01	36	1118	66	57	67	4	69	11	67	4	98.5075
2015KM1-095	0.05938	0.00444	0.62172	0.04582	0.07585	0.00135	0.08185	0.0097	0.9	32.33	0.32	581	130	491	29	471	8	1590	181	471	8	104.246
2015KM1-096	0.06067	0.00521	0.84547	0.07183	0.10096	0.00189	0.0212	0.002	0.9	3.99	0.04	628	152	622	40	620	11	424	40	620	11	100.323
2015KM1-097	0.05982	0.00314	0.81469	0.04228	0.09867	0.00138	0.02804	0.00088	0.9	2.59	0.03	597	88	605	24	607	8	559	17	607	8	99.6705
2015KM1-098	0.05997	0.00411	0.63722	0.04302	0.07698	0.00129	0.02533	0.00283	0.9	12.28	0.12	602	118	501	27	478	8	506	56	478	8	104.812
Standards
PLE-01	0.05427	0.00158	0.40125	0.01067	0.05363	0.00063	0.01676	0.00018	0.87	12.19	0.12	382	67	343	8	337	4	336	3	337	4	101.78
PLE-02	0.04991	0.00173	0.36896	0.01265	0.05368	0.00067	0.01956	0.00089	0.9	12.92	0.13	191	56	319	9	337	4	392	18	337	4	94.6588
PLE-03	0.05384	0.00198	0.39844	0.01445	0.0537	0.0007	0.01343	0.00101	0.9	12.82	0.13	364	58	341	10	337	4	270	20	337	4	101.187
PLE-04	0.05097	0.00156	0.37708	0.01136	0.05366	0.00065	0.01502	0.00065	0.9	11.41	0.11	239	47	325	8	337	4	301	13	337	4	96.4392
PLE-05	0.05477	0.00237	0.40419	0.01715	0.0535	0.00074	0.02368	0.00136	0.9	13.68	0.14	403	70	345	12	336	5	473	27	336	5	102.679
PLE-06	0.05331	0.00249	0.39518	0.01813	0.05372	0.00075	0.01734	0.00134	0.9	13.59	0.14	342	79	338	13	337	5	347	27	337	5	100.297
PLE-07	0.05171	0.00255	0.38346	0.01863	0.05373	0.00075	0.01588	0.00115	0.9	11.76	0.12	273	86	330	14	337	5	318	23	337	5	97.9228
PLE-08	0.05574	0.0024	0.41371	0.01757	0.05377	0.00071	0.02074	0.00135	0.9	14.68	0.15	442	71	352	13	338	4	415	27	338	4	104.142
PLE-09	0.05399	0.00162	0.40009	0.01183	0.05368	0.00063	0.01942	0.00082	0.9	13.87	0.14	371	45	342	9	337	4	389	16	337	4	101.484
PLE-10	0.0532	0.00254	0.39391	0.01851	0.05364	0.00072	0.01487	0.00108	0.9	12	0.12	337	82	337	13	337	4	298	22	337	4	100
PLE-11	0.05282	0.00628	0.39425	0.04632	0.05408	0.00122	0.0147	0.00386	0.9	15.72	0.16	321	223	337	34	340	7	295	77	340	7	99.1176
2015KM03
2015KM3-001	0.06088	0.00235	0.70767	0.02726	0.08435	0.0013	0.02756	0.00069	0.9	2.25	0.02	635	56	543	16	522	8	550	14	522	8	104.023
2015KM3-002	0.07501	0.00174	1.55192	0.03722	0.15013	0.00208	0.04135	0.0009	0.9	3.33	0.03	1069	27	951	15	902	12	819	17	902	12	105.432
2015KM3-003	0.05485	0.0198	0.55709	0.20075	0.07369	0.00194	0.04798	0.00121	0.9	0.56	0.01	406	619	450	131	458	12	947	23	458	12	98.2533
2015KM3-004	0.06213	0.00357	0.9604	0.05503	0.11217	0.00178	0.0294	0.0013	0.9	2.07	0.02	679	95	684	29	685	10	586	26	685	10	99.854
2015KM3-005	0.07107	0.00379	1.58745	0.08479	0.16206	0.00252	0.04331	0.00222	0.9	2.81	0.03	959	84	965	33	968	14	857	43	968	14	99.6901
2015KM3-006	0.06389	0.00378	1.09678	0.06503	0.12455	0.00184	0.03781	0.00071	0.9	0.8	0.01	738	101	752	31	757	11	750	14	757	11	99.3395
2015KM3-007	0.05956	0.00096	0.79854	0.01412	0.09728	0.00124	0.03198	0.00094	0.9	11.06	0.11	588	18	596	8	598	7	636	18	598	7	99.6656
2015KM3-008	0.0713	0.00218	1.58263	0.0493	0.16105	0.00219	0.02527	0.00086	0.9	1.5	0.02	966	41	963	19	963	12	504	17	963	12	100
2015KM3-009	0.05872	0.00947	0.69109	0.11117	0.08539	0.00166	0.00883	0.00075	0.9	0.5	0.01	557	327	533	67	528	10	178	15	528	10	100.947
2015KM3-010	0.0675	0.00234	0.90764	0.03157	0.09757	0.00147	0.03244	0.00055	0.9	1.11	0.01	853	47	656	17	600	9	645	11	600	9	109.333
2015KM3-011	0.05794	0.00199	0.68937	0.02411	0.08633	0.00115	0.02311	0.00051	0.9	1.83	0.02	527	53	532	14	534	7	462	10	534	7	99.6255
2015KM3-012	0.16813	0.0025	10.6446	0.17616	0.45936	0.00621	0.0198	0.00359	0.9	4.43	0.04	2539	13	2493	15	2437	27	396	71	2539	13	104.185
2015KM3-013	0.06179	0.00742	0.89097	0.10686	0.10462	0.00177	0.02089	0.00121	0.9	0.91	0.01	667	234	647	57	641	10	418	24	641	10	100.936
2015KM3-014	0.07578	0.00356	1.83676	0.08544	0.17587	0.00316	0.0447	0.00108	0.9	0.89	0.01	1089	64	1059	31	1044	17	884	21	1089	64	104.31
2015KM3-015	0.09981	0.00355	3.81524	0.13757	0.27735	0.00395	0.01533	0.0034	0.9	2.91	0.03	1621	46	1596	29	1578	20	308	68	1621	46	102.725
2015KM3-016	0.08022	0.01325	2.12799	0.35031	0.19246	0.00407	-0.02688	0.00266	0.9	0.63	0.01	1202	306	1158	114	1135	22	-551	55	1202	306	105.903
2015KM3-017	0.06102	0.00373	0.91451	0.05594	0.10874	0.00164	0.03156	0.00097	0.9	1.62	0.02	640	106	659	30	665	10	628	19	665	10	99.0977
2015KM3-018	0.07572	0.00177	1.77348	0.04309	0.16993	0.00228	0.02889	0.0018	0.9	6.7	0.07	1088	28	1036	16	1012	13	576	35	1088	28	107.51
2015KM3-019	0.05959	0.0022	0.65392	0.0243	0.07962	0.00113	-0.01002	0.00194	0.9	9.21	0.09	589	56	511	15	494	7	-204	40	494	7	103.441
2015KM3-020	0.06096	0.00111	0.67107	0.01303	0.07987	0.00105	0.02417	0.00056	0.9	9.48	0.09	638	21	521	8	495	6	483	11	495	6	105.253
2015KM3-021	0.06062	0.0019	0.86802	0.02771	0.10389	0.00141	0.02028	0.00054	0.9	1.89	0.02	626	45	634	15	637	8	406	11	637	8	99.529
2015KM3-022	0.05814	0.00306	0.70626	0.03734	0.08813	0.00122	0.0344	0.0013	0.9	3.67	0.04	535	92	543	22	544	7	684	25	544	7	99.8162
2015KM3-023	0.05687	0.00077	0.62252	0.00949	0.07943	0.00101	0.03773	0.00063	0.9	20.48	0.2	486	15	491	6	493	6	749	12	493	6	99.5943
2015KM3-024	0.0571	0.0073	0.61323	0.07806	0.07793	0.00156	0.01994	0.00061	0.9	0.58	0.01	495	249	486	49	484	9	399	12	484	9	100.413
2015KM3-025	0.06236	0.00274	0.83278	0.03661	0.0969	0.00145	0.00565	0.00061	0.9	1.96	0.02	686	68	615	20	596	9	114	12	596	9	103.188
2015KM3-026	0.13364	0.00211	6.88235	0.11865	0.37365	0.00498	0.03763	0.00124	0.9	2.17	0.02	2146	14	2096	15	2047	23	747	24	2146	14	104.836
2015KM3-027	0.08078	0.00191	2.18642	0.05326	0.19638	0.00277	0.04658	0.00078	0.9	1.45	0.01	1216	27	1177	17	1156	15	920	15	1216	27	105.19
2015KM3-028	0.09344	0.00137	3.39611	0.05512	0.26371	0.00345	0.09911	0.00122	0.9	2.92	0.03	1497	14	1503	13	1509	18	1910	22	1497	14	99.2048
2015KM3-029	0.07909	0.0039	2.10513	0.10393	0.19311	0.00287	0.13206	0.00617	0.9	5.99	0.06	1174	74	1150	34	1138	16	2507	110	1174	74	103.163
2015KM3-030	0.10851	0.0016	5.00588	0.08181	0.3347	0.00443	0.09665	0.00136	0.9	2.74	0.03	1775	14	1820	14	1861	21	1865	25	1775	14	95.3788
2015KM3-31	0.07268	0.00389	1.58096	0.08058	0.15776	0.00254	0.04767	0.00062	0.9	1.36	0.01	1005	111	963	32	944	14	941	12	944	14	102.013
2015KM3-32	0.07725	0.00206	2.15284	0.05905	0.2022	0.00277	0.02451	0.00184	0.9	3.8	0.04	1128	33	1166	19	1187	15	489	36	1128	33	95.0295
2015KM3-33	0.1545	0.00215	9.10223	0.14231	0.42746	0.00572	0.11635	0.0013	0.9	1.15	0.01	2396	12	2348	14	2294	26	2225	24	2396	12	104.446
2015KM3-34	0.14074	0.00176	7.90112	0.11421	0.40731	0.0053	0.10792	0.00112	0.9	1.49	0.01	2236	11	2220	13	2203	24	2071	20	2236	11	101.498
2015KM3-35	0.2646	0.00366	23.3656	0.36925	0.6407	0.00901	0.13303	0.00384	0.9	2.53	0.03	3274	11	3242	15	3192	35	2524	69	3274	11	102.569
2015KM3-36	0.17803	0.00196	12.9189	0.17084	0.5265	0.00675	0.09293	0.00105	0.9	2.73	0.03	2635	10	2674	12	2727	29	1796	19	2635	10	96.6263
2015KM3-37	0.05814	0.00127	0.7349	0.0167	0.09172	0.00122	0.02604	0.00045	0.9	3.42	0.03	535	27	559	10	566	7	520	9	566	7	98.7633
2015KM3-38	0.06029	0.00974	0.71629	0.11479	0.0862	0.00242	0.02341	0.00088	0.9	0.57	0.01	614	306	548	68	533	14	468	17	533	14	102.814
2015KM3-39	0.05892	0.00156	0.69854	0.01885	0.08602	0.00119	0.02386	0.00026	0.9	0.56	0.01	564	35	538	11	532	7	477	5	532	7	101.128
2015KM3-40	0.05891	0.00178	0.82294	0.02531	0.10136	0.00138	0.03228	0.00092	0.9	4.41	0.04	564	43	610	14	622	8	642	18	622	8	98.0707
2015KM3-041	0.07304	0.00201	1.66775	0.0469	0.16568	0.00229	0.04562	0.0011	0.9	2.33	0.02	1015	35	996	18	988	13	902	21	988	13	100.81
2015KM3-042	0.06116	0.00139	0.72079	0.0169	0.08551	0.00116	0.02437	0.00029	0.9	1.08	0.01	645	28	551	10	529	7	487	6	529	7	104.159
2015KM3-043	0.07167	0.00164	1.60351	0.0378	0.16233	0.00225	0.05307	0.00113	0.9	3.98	0.04	977	26	972	15	970	12	1045	22	970	12	100.206
2015KM3-044	0.11842	0.00245	6.08773	0.13154	0.37299	0.00542	0.11394	0.0019	0.9	1.57	0.02	1933	19	1988	19	2043	25	2181	34	1933	19	94.6158
2015KM3-045	0.06991	0.00904	1.24722	0.15909	0.12944	0.0039	0.04292	0.0012	0.9	0.36	0.01	926	217	822	72	785	22	849	23	785	22	104.713
2015KM3-046	0.05925	0.00112	0.59711	0.01189	0.07312	0.00096	0.01993	0.0002	0.9	0.94	0.01	576	22	475	8	455	6	399	4	455	6	104.396
2015KM3-047	0.06186	0.00149	0.85494	0.02111	0.10028	0.00137	0.02723	0.00042	0.9	1.9	0.02	669	30	627	12	616	8	543	8	616	8	101.786
2015KM3-048	0.07033	0.00096	1.62231	0.02501	0.16737	0.00215	0.04567	0.00063	0.9	5.43	0.05	938	14	979	10	998	12	903	12	998	12	98.0962
2015KM3-049	0.11214	0.00129	5.21943	0.07094	0.33769	0.00432	0.08486	0.00093	0.9	3.61	0.04	1834	11	1856	12	1876	21	1646	17	1834	11	97.7612
2015KM3-050	0.05853	0.0015	0.67273	0.01768	0.08339	0.00115	0.02299	0.00027	0.9	0.8	0.01	550	34	522	11	516	7	459	5	516	7	101.163
2015KM3-051	0.07138	0.00188	1.3006	0.03484	0.13221	0.00187	0.03662	0.00061	0.9	1.55	0.02	968	32	846	15	800	11	727	12	800	11	105.75
2015KM3-052	0.1344	0.00175	7.42425	0.11034	0.40079	0.00526	0.09939	0.00098	0.9	0.99	0.01	2156	12	2164	13	2173	24	1915	18	2156	12	99.2177
2015KM3-053	0.06821	0.00253	1.19646	0.04439	0.12727	0.00197	0.03595	0.00065	0.9	1.05	0.01	875	51	799	21	772	11	714	13	772	11	103.497
2015KM3-054	0.06913	0.00149	1.39809	0.02426	0.14667	0.00187	0.04457	0.00057	0.89	13.91	0.14	903	45	888	10	882	10	881	11	882	10	100.68
2015KM3-055	0.08589	0.00166	2.63109	0.05357	0.22226	0.00304	0.06241	0.00084	0.9	1.48	0.01	1336	20	1309	15	1294	16	1224	16	1336	20	103.246
2015KM3-056	0.06055	0.00341	0.69978	0.03897	0.08385	0.00147	0.02348	0.00049	0.9	0.78	0.01	623	90	539	23	519	9	469	10	519	9	103.854
2015KM3-057	0.12854	0.00161	6.09244	0.08785	0.3439	0.00447	0.05187	0.00154	0.9	10.5	0.11	2078	11	1989	13	1905	21	1022	30	2078	11	109.081
2015KM3-058	0.0715	0.00111	1.62341	0.02763	0.16473	0.00213	0.01145	0.00046	0.9	3.52	0.04	972	16	979	11	983	12	230	9	983	12	99.5931
2015KM3-059	0.05966	0.00156	0.71072	0.01895	0.08643	0.00119	0.02474	0.0004	0.9	1.95	0.02	591	34	545	11	534	7	494	8	534	7	102.06
2015KM3-060	0.10456	0.00135	4.35051	0.06415	0.30188	0.00392	0.07655	0.00087	0.9	2.36	0.02	1707	12	1703	12	1701	19	1491	16	1707	12	100.353
2015KM3-061	0.07357	0.00178	1.61475	0.04	0.15925	0.00223	0.04135	0.00057	0.9	1.12	0.01	1030	28	976	16	953	12	819	11	953	12	102.413
2015KM3-062	0.04782	0.00704	0.09801	0.01437	0.01487	0.00029	0.00324	0.00027	0.9	1.58	0.02	90	258	95	13	95	2	65	5	95	2	100
2015KM3-063	0.10427	0.00145	4.05254	0.06287	0.28201	0.0037	0.07947	0.00094	0.9	2.27	0.02	1701	13	1645	13	1601	19	1546	18	1701	13	106.246
2015KM3-064	0.07155	0.00113	1.61644	0.02771	0.16392	0.00214	0.04811	0.00065	0.9	3.35	0.03	973	16	977	11	979	12	950	13	979	12	99.7957
2015KM3-065	0.07813	0.00107	2.06095	0.03157	0.19141	0.00247	0.06118	0.00228	0.9	47.1	0.47	1150	14	1136	10	1129	13	1200	43	1150	14	101.86
2015KM3-066	0.06583	0.00121	1.11672	0.02169	0.12309	0.00163	0.0386	0.00103	0.9	11.99	0.12	801	20	761	10	748	9	766	20	748	9	101.738
2015KM3-067	0.05914	0.00249	0.66328	0.02777	0.08138	0.00127	0.02293	0.00032	0.9	0.53	0.01	572	64	517	17	504	8	458	6	504	8	102.579
2015KM3-068	0.06064	0.00265	0.83734	0.03656	0.1002	0.00152	0.03067	0.00105	0.9	2.94	0.03	626	68	618	20	616	9	611	21	616	9	100.325
2015KM3-069	0.11297	0.00184	5.37388	0.09473	0.34515	0.00469	0.0921	0.00129	0.9	1.87	0.02	1848	15	1881	15	1911	22	1781	24	1848	15	96.7033
2015KM3-070	0.07555	0.00366	1.78691	0.0859	0.17161	0.00298	0.04584	0.00149	0.9	1.77	0.02	1083	68	1041	31	1021	16	906	29	1083	68	106.072
2015KM3-071	0.07849	0.0016	2.01714	0.04298	0.18647	0.00256	0.04606	0.00118	0.9	5.55	0.06	1159	22	1121	14	1102	14	910	23	1159	22	105.172
2015KM3-072	0.06549	0.002	1.19211	0.03247	0.13201	0.00182	0.04036	0.00054	0.87	18.39	0.18	790	66	797	15	799	10	800	11	799	10	99.7497
2015KM3-073	0.05981	0.00142	0.63931	0.01558	0.07756	0.00106	0.02085	0.00029	0.9	1.53	0.02	597	30	502	10	482	6	417	6	482	6	104.149
2015KM3-074	0.07014	0.00097	1.46919	0.02264	0.15199	0.00196	0.04471	0.00082	0.9	11.81	0.12	932	14	918	9	912	11	884	16	912	11	100.658
2015KM3-075	0.06991	0.00099	1.56887	0.02476	0.16284	0.00211	0.04665	0.00079	0.9	8.32	0.08	926	15	958	10	973	12	922	15	973	12	98.4584
2015KM3-076	0.05762	0.00498	0.65984	0.05672	0.08309	0.0015	0.02205	0.00051	0.9	0.71	0.01	515	159	515	35	515	9	441	10	515	9	100
2015KM3-077	0.07368	0.00176	1.67481	0.04106	0.16493	0.00233	0.04284	0.00072	0.9	1.74	0.02	1033	28	999	16	984	13	848	14	984	13	101.524
2015KM3-078	0.24192	0.00348	21.8206	0.35172	0.65449	0.00937	0.19619	0.0029	0.9	1.51	0.02	3133	11	3176	16	3246	37	3621	49	3133	11	96.5188
2015KM3-079	0.07207	0.00202	1.66302	0.04711	0.16744	0.00244	0.04128	0.00068	0.9	1.19	0.01	988	34	995	18	998	13	818	13	998	13	99.6994
2015KM3-080	0.07043	0.00193	1.47031	0.04092	0.15147	0.00219	0.04028	0.00093	0.9	2.88	0.03	941	34	918	17	909	12	798	18	909	12	100.99
2015KM3-081	0.06737	0.00216	1.23859	0.03997	0.1334	0.00199	0.03427	0.00062	0.9	1.27	0.01	849	42	818	18	807	11	681	12	807	11	101.363
2015KM3-082	0.06015	0.00497	0.85443	0.07025	0.10308	0.00182	0.01954	0.00129	0.9	1.61	0.02	609	149	627	38	632	11	391	26	632	11	99.2089
2015KM3-083	0.05793	0.00488	0.68342	0.05734	0.0856	0.0015	0.02758	0.00091	0.9	1.52	0.02	527	155	529	35	529	9	550	18	529	9	100
2015KM3-084	0.06091	0.00171	0.76799	0.0219	0.09149	0.00129	0.0266	0.00056	0.9	3.07	0.03	636	37	579	13	564	8	531	11	564	8	102.66
2015KM3-085	0.10448	0.00143	4.50166	0.06897	0.31267	0.00411	0.08569	0.00089	0.9	1.52	0.02	1705	13	1731	13	1754	20	1662	17	1705	13	97.2064
2015KM3-086	0.15121	0.00203	8.61678	0.13019	0.41353	0.00553	0.09958	0.00117	0.9	1.47	0.01	2360	12	2298	14	2231	25	1919	22	2360	12	105.782
2015KM3-087	0.09147	0.00182	3.22243	0.06711	0.25564	0.00357	0.06814	0.00104	0.9	1.72	0.02	1456	20	1463	16	1467	18	1332	20	1456	20	99.2502
2015KM3-088	0.15777	0.00165	9.7219	0.12331	0.44716	0.00572	0.1075	0.00126	0.9	6.23	0.06	2432	10	2409	12	2383	25	2064	23	2432	10	102.056
2015KM3-089	0.06943	0.0012	1.42931	0.02645	0.14938	0.00198	0.04861	0.00106	0.9	8.89	0.09	912	18	901	11	897	11	959	20	897	11	100.446
2015KM3-090	0.19237	0.00249	15.3535	0.22708	0.57916	0.00785	0.63892	0.03462	0.9	70.54	0.71	2763	11	2837	14	2945	32	9986	427	2763	11	93.82
2015KM3-091	0.04806	0.01137	0.12281	0.02895	0.01854	0.00045	0.00999	0.0004	0.9	1.55	0.02	102	372	118	26	118	3	201	8	118	3	100
2015KM3-092	0.05917	0.00098	0.80713	0.01443	0.09899	0.00129	0.02735	0.00028	0.9	1.54	0.02	573	19	601	8	608	8	545	6	608	8	98.8487
2015KM3-093	0.07028	0.00312	1.32496	0.05827	0.13681	0.00231	0.03103	0.00079	0.9	1.21	0.01	937	62	857	25	827	13	618	15	827	13	103.628
2015KM3-094	0.06509	0.00097	1.17264	0.01909	0.13074	0.0017	0.04843	0.00094	0.9	13.34	0.13	777	16	788	9	792	10	956	18	792	10	99.4949
2015KM3-095	0.05657	0.00085	0.60113	0.00987	0.07712	0.001	0.02316	0.0004	0.9	9.29	0.09	475	17	478	6	479	6	463	8	479	6	99.7912
2015KM3-096	0.05494	0.00076	0.55161	0.00854	0.07287	0.00094	0.02031	0.00037	0.9	13.18	0.13	410	16	446	6	453	6	406	7	453	6	98.4547
2015KM3-097	0.07238	0.00136	1.65455	0.03281	0.16588	0.00223	0.0406	0.00038	0.9	0.58	0.01	997	20	991	13	989	12	804	7	989	12	100.202
2015KM3-098	0.09716	0.00157	3.67652	0.06413	0.27461	0.00369	0.06648	0.00066	0.9	0.76	0.01	1570	15	1566	14	1564	19	1301	13	1570	15	100.384
2015KM3-099	0.05755	0.00525	0.65454	0.05907	0.08254	0.00172	0.02082	0.00048	0.9	0.51	0.01	513	163	511	36	511	10	416	10	511	10	100
2015KM3-100	0.07203	0.00147	1.59817	0.03413	0.16102	0.00217	0.03586	0.00067	0.9	2.36	0.02	987	23	969	13	962	12	712	13	962	12	100.728
Standards
PLE-01	0.05421	0.00148	0.40076	0.01114	0.05364	0.00074	0.01853	0.00064	0.9	10.17	0.1	380	38	342	8	337	5	371	13	337	5	101.484
PLE-02	0.05347	0.00124	0.39578	0.00952	0.05371	0.00072	0.01744	0.00051	0.9	9.74	0.1	349	31	339	7	337	4	349	10	337	4	100.593
PLE-03	0.05261	0.00119	0.38974	0.00911	0.05375	0.00072	0.01597	0.00046	0.9	9.7	0.1	312	30	334	7	338	4	320	9	338	4	98.8166
PLE-04	0.05443	0.00156	0.40278	0.0117	0.05369	0.00075	0.01659	0.00063	0.9	10.2	0.1	389	40	344	8	337	5	333	13	337	5	102.077
PLE-05	0.05262	0.00112	0.38935	0.00867	0.05369	0.00071	0.0181	0.00046	0.9	10.02	0.1	312	28	334	6	337	4	363	9	337	4	99.1098
PLE-06	0.05334	0.00122	0.39501	0.00937	0.05373	0.00072	0.01666	0.00048	0.9	9.8	0.1	343	30	338	7	337	4	334	10	337	4	100.297
PLE-07	0.05336	0.00149	0.39512	0.01119	0.05373	0.00075	0.01977	0.00064	0.9	9.86	0.1	344	39	338	8	337	5	396	13	337	5	100.297
PLE-08	0.05344	0.00111	0.39426	0.00858	0.05353	0.0007	0.01758	0.00054	0.9	9.62	0.1	348	27	337	6	336	4	352	11	336	4	100.298
PLE-09	0.0537	0.00113	0.39695	0.00869	0.05364	0.00071	0.01794	0.00045	0.9	9.86	0.1	358	27	339	6	337	4	359	9	337	4	100.593
PLE-10	0.05325	0.00111	0.39435	0.00858	0.05374	0.00072	0.01608	0.00042	0.9	9.69	0.1	339	26	338	6	337	4	322	8	337	4	100.297
PLE-11	0.05297	0.00113	0.39265	0.00868	0.05379	0.00072	0.01759	0.00044	0.9	9.94	0.1	328	27	336	6	338	4	352	9	338	4	99.4083
2015KM04
2015KM4-001	0.06838	0.00089	1.43737	0.02227	0.15227	0.00204	0.04889	0.00051	0.9	1.31	0.01	880	14	905	9	914	11	965	10	94	11	99.0153
2015KM4-002	0.07167	0.00085	1.69291	0.02463	0.17111	0.00228	0.05367	0.00053	0.9	1.04	0.01	977	13	1006	9	1018	13	1057	10	40	2	95.9725
2015KM4-003	0.09241	0.00133	3.35703	0.05563	0.26317	0.00359	0.08447	0.00095	0.9	1.09	0.01	1476	14	1494	13	1506	18	1639	18	442	4	98.008
2015KM4-005	0.06057	0.00366	0.78945	0.04761	0.09443	0.00159	0.02413	0.00054	0.9	0.55	0.01	624	101	591	27	582	9	482	11	957	8	101.546
2015KM4-006	0.06157	0.00096	0.7644	0.01338	0.08996	0.00121	0.02993	0.00031	0.9	0.86	0.01	659	17	577	8	555	7	596	6	391	3	103.964
2015KM4-007	0.061	0.00086	0.88277	0.01443	0.10486	0.0014	0.03424	0.00039	0.9	2.07	0.02	639	16	642	8	643	8	680	8	73	1	99.8445
2015KM4-008	0.07394	0.00149	1.76466	0.03809	0.17293	0.00238	0.01059	0.00094	0.9	3.45	0.03	1040	23	1033	14	1028	13	213	19	75	0.8	101.167
2015KM4-009	0.0732	0.00098	1.58787	0.02492	0.15719	0.00211	0.05202	0.0006	0.9	2.43	0.02	1019	14	965	10	941	12	1025	12	72	5	102.55
2015KM4-010	0.07365	0.00115	1.54625	0.02703	0.15213	0.00207	0.04913	0.00056	0.9	1.27	0.01	1032	16	949	11	913	12	969	11	45	1	103.943
2015KM4-011	0.08584	0.00091	2.67373	0.03602	0.22572	0.00297	0.06548	0.00062	0.9	1.93	0.02	1335	12	1321	10	1312	16	1282	12	74	5	101.753
2015KM4-012	0.10992	0.00148	5.00739	0.07893	0.33013	0.00448	0.10266	0.00121	0.9	1.54	0.02	1798	13	1821	13	1839	22	1975	22	80	3	97.7705
2015KM4-013	0.06571	0.00778	0.94303	0.1102	0.10401	0.00288	0.0314	0.00251	0.9	1.98	0.02	797	202	674	58	638	17	625	49	72	2	105.643
2015KM4-014	0.09665	0.00115	3.71942	0.05371	0.27891	0.00371	0.08304	0.00081	0.9	0.93	0.01	1560	12	1576	12	1586	19	1612	15	75	1	98.3607
2015KM4-015	0.05799	0.00277	0.70093	0.03363	0.0876	0.00131	0.02685	0.00041	0.9	0.57	0.01	529	79	539	20	541	8	536	8	45	3	99.6303
2015KM4-016	0.15647	0.00417	9.22195	0.2049	0.42746	0.00628	0.11936	0.00169	0.92	1.33	0.01	2418	46	2360	20	2294	28	2279	31	43.3	0.7	105.405
2015KM4-017	0.06716	0.00175	1.28228	0.02866	0.13847	0.00186	0.04221	0.00054	0.9	3.82	0.04	843	56	838	13	836	11	836	10	80	1	100.239
2015KM4-018	0.07276	0.00101	1.66993	0.02685	0.16637	0.00223	0.05016	0.00053	0.9	1.29	0.01	1007	15	997	10	992	12	989	10	125	2	100.504
2015KM4-019	0.07098	0.00108	1.6372	0.02803	0.1672	0.00225	0.05328	0.00064	0.9	1.97	0.02	957	16	985	11	997	12	1049	12	83	2	98.7964
2015KM4-020	0.09013	0.00192	2.89976	0.06537	0.2332	0.0033	0.06368	0.00195	0.9	3.68	0.04	1428	23	1382	17	1351	17	1248	37	94	2	105.699
2015KM4-021	0.06937	0.00087	1.39775	0.02092	0.14607	0.00193	0.04632	0.00052	0.9	3.29	0.03	910	14	888	9	879	11	915	10	74	5	101.024
2015KM4-022	0.07527	0.00084	1.88122	0.02612	0.18118	0.00238	0.05745	0.00064	0.9	5.99	0.06	1076	13	1074	9	1073	13	1129	12	80	3	100.28
2015KM4-023	0.07333	0.00119	1.73859	0.03134	0.17188	0.00233	0.0539	0.00064	0.9	1.48	0.01	1023	17	1023	12	1022	13	1061	12	92	2	100.098
2015KM4-024	0.11041	0.00123	5.20058	0.07177	0.3415	0.0045	0.09552	0.00096	0.9	1.98	0.02	1806	11	1853	12	1894	22	1844	18	82	1	95.3537
2015KM4-026	0.05279	0.00726	0.09797	0.01331	0.01346	0.00036	0.00469	0.00024	0.9	1.23	0.01	320	257	95	12	86	2	95	5	45.1	1	103.853
2015KM4-027	0.06208	0.00188	0.79353	0.02441	0.09267	0.00136	0.03078	0.00042	0.9	0.79	0.01	677	41	593	14	571	8	613	8	56	3	103.584
2015KM4-028	0.09374	0.00116	3.26271	0.04811	0.25236	0.00335	0.08128	0.00085	0.9	1.87	0.02	1503	12	1472	11	1451	17	1579	16	283	3	105.981
2015KM4-029	0.06265	0.00286	0.74747	0.03402	0.08651	0.00143	0.02798	0.00053	0.9	0.82	0.01	696	69	567	20	535	8	558	10	46	2	94.9503
2015KM4-030	0.14552	0.00259	9.12509	0.17663	0.45469	0.00666	0.12773	0.00276	0.9	2.59	0.03	2294	16	2351	18	2416	30	2430	49	43	2	102.694
2015KM4-31	0.1029	0.00215	4.0913	0.09028	0.2883	0.00421	0.10165	0.00159	0.9	1.4	0.01	1677	21	1653	18	1633	21	1957	29	82	3	95.4577
2015KM4-32	0.08823	0.00153	3.0752	0.05801	0.25274	0.00348	0.07741	0.00105	0.9	1.65	0.02	1387	17	1427	14	1453	18	1507	20	82	1	99.7919
2015KM4-33	0.07091	0.00114	1.57206	0.02805	0.16077	0.00216	0.05605	0.00065	0.9	1.67	0.02	955	17	959	11	961	12	1102	12	40	0.4	98.6711
2015KM4-34	0.05896	0.00168	0.79579	0.02337	0.09789	0.00137	0.01104	0.00061	0.9	1.91	0.02	566	40	594	13	602	8	222	12	45.9	0.5	104.055
2015KM4-35	0.07437	0.00133	1.74164	0.03367	0.16984	0.00232	0.05778	0.0007	0.9	1.37	0.01	1052	19	1024	12	1011	13	1135	13	45	1	98.1124
2015KM4-36	0.14063	0.0015	8.22097	0.10976	0.42396	0.00555	0.13767	0.00128	0.9	1.77	0.02	2235	10	2256	12	2278	25	2607	23	81	3	94.7612
2015KM4-37	0.08135	0.00113	2.50137	0.03976	0.22299	0.00297	0.06704	0.00068	0.9	1.14	0.01	1230	14	1272	12	1298	16	1312	13	165	6	98.0707
2015KM4-38	0.06803	0.00183	1.46157	0.04066	0.15581	0.00217	0.05895	0.00196	0.9	4.47	0.04	869	35	915	17	933	12	1158	37	81	8	99.7332
2015KM4-39	0.09335	0.00139	3.36919	0.05654	0.26177	0.00353	0.08201	0.00094	0.9	1.41	0.01	1495	15	1497	13	1499	18	1593	18	739	5	99.4786
2015KM4-40	0.07047	0.00139	1.55776	0.03263	0.16032	0.00221	0.05162	0.00078	0.9	2.19	0.02	942	22	954	13	959	12	1017	15	42	2	99.591
2015KM4-041	0.07125	0.00212	1.60934	0.04874	0.16384	0.00244	0.05059	0.00085	0.9	1.17	0.01	965	38	974	19	978	14	998	16	88	10	98.5584
2015KM4-043	0.0843	0.00115	2.63529	0.04115	0.22677	0.00301	0.06598	0.00095	0.9	4.63	0.05	1299	14	1311	11	1318	16	1291	18	145	21	97.8809
2015KM4-044	0.06984	0.00145	1.59989	0.03499	0.16616	0.0023	0.05462	0.00083	0.9	2.11	0.02	924	24	970	14	991	13	1075	16	104	2	99.5996
2015KM4-045	0.07199	0.0009	1.66446	0.02454	0.16771	0.0022	0.07781	0.0012	0.9	14.53	0.15	986	13	995	9	999	12	1515	23	92.8	0.8	100.278
2015KM4-046	0.07546	0.0012	1.89353	0.03336	0.18204	0.00244	0.0595	0.00078	0.9	2.54	0.03	1081	17	1079	12	1078	13	1168	15	45.4	0.8	102.679
2015KM4-047	0.04951	0.00502	0.11963	0.012	0.01753	0.00037	0.00524	0.00018	0.9	1.02	0.01	172	186	115	11	112	2	106	4	444	5	100.082
2015KM4-048	0.08075	0.00129	2.30578	0.04069	0.20715	0.00279	0.06435	0.00074	0.9	1.43	0.01	1215	16	1214	12	1214	15	1261	14	44	2	100.522
2015KM4-049	0.06524	0.00107	1.13499	0.02041	0.12621	0.00168	0.04199	0.00048	0.9	1.76	0.02	782	18	770	10	766	10	831	9	47	2	97.5713
2015KM4-050	0.06806	0.00117	1.48382	0.02779	0.15817	0.00213	0.0482	0.00065	0.9	2.39	0.02	870	19	924	11	947	12	951	13	72	1	97.2129
2015KM4-051	0.06611	0.00118	1.36054	0.02617	0.14932	0.00201	0.04331	0.00064	0.9	2.7	0.03	810	20	872	11	897	11	857	12	74	1	99.6425
2015KM4-052	0.07677	0.00183	2.00537	0.04945	0.18952	0.0027	0.0601	0.00098	0.9	1.65	0.02	1115	27	1117	17	1119	15	1180	19	166	3	101.85
2015KM4-053	0.07162	0.00099	1.51287	0.02374	0.15327	0.00201	0.0462	0.00054	0.9	2.96	0.03	975	14	936	10	919	11	913	10	543	4	101.29
2015KM4-054	0.05331	0.00105	0.36196	0.00548	0.04924	0.00062	0.01542	0.00022	0.89	34.12	0.34	342	46	314	4	310	4	309	4	42	2	98.0366
2015KM4-055	0.09105	0.00118	3.23069	0.04865	0.25743	0.00339	0.0756	0.00072	0.9	1.02	0.01	1448	13	1465	12	1477	17	1473	14	87	2	98.26
2015KM4-056	0.11762	0.00164	5.74085	0.09079	0.35414	0.00476	0.10344	0.00125	0.9	1.76	0.02	1920	13	1938	14	1954	23	1990	23	80	1	108.354
2015KM4-057	0.07408	0.00147	1.35284	0.02843	0.1325	0.00181	0.0194	0.00053	0.9	3.06	0.03	1044	22	869	12	802	10	388	11	873	7	101.138
2015KM4-058	0.10869	0.00125	4.69532	0.065	0.31344	0.00408	0.07747	0.00088	0.9	3.51	0.04	1778	11	1766	12	1758	20	1508	17	42	3	103
2015KM4-059	0.07358	0.00133	1.70137	0.03298	0.16778	0.00227	0.05244	0.00068	0.9	1.84	0.02	1030	19	1009	12	1000	13	1033	13	80	3	94.9861
2015KM4-060	0.07334	0.00136	1.83785	0.03646	0.18184	0.00247	0.05375	0.00065	0.9	1.25	0.01	1023	20	1059	13	1077	13	1058	12	79	2	99.1843
2015KM4-061	0.11153	0.00143	5.07501	0.07531	0.3302	0.00435	0.09597	0.00115	0.9	2.61	0.03	1824	12	1832	13	1839	21	1852	21	81	1	101.974
2015KM4-062	0.08178	0.00143	2.34001	0.04405	0.20763	0.00282	0.06786	0.001	0.9	2.65	0.03	1240	18	1225	13	1216	15	1327	19	53	2	107.039
2015KM4-063	0.07649	0.00291	1.57007	0.0596	0.14895	0.00243	0.04335	0.00066	0.9	0.5	0.01	1108	50	958	24	895	14	858	13	42	1	98.6235
2015KM4-064	0.08085	0.0014	2.35163	0.04401	0.21107	0.00285	0.05533	0.00068	0.9	1.35	0.01	1218	18	1228	13	1235	15	1088	13	74	7	100
2015KM4-065	0.06163	0.00131	0.91398	0.02037	0.10761	0.00147	0.0344	0.00044	0.9	1.46	0.01	661	26	659	11	659	9	684	9	39.3	0.8	103.203
2015KM4-066	0.06142	0.00121	0.77096	0.016	0.09109	0.00122	0.02797	0.00034	0.9	1.55	0.02	654	23	580	9	562	7	558	7	44.2	0.8	99.6124
2015KM4-067	0.05737	0.0036	0.65847	0.04119	0.08329	0.00139	0.02552	0.00035	0.9	0.35	0.01	506	109	514	25	516	8	509	7	44.6	0.9	99.068
2015KM4-068	0.07479	0.00099	1.86596	0.02826	0.18107	0.00236	0.08964	0.00108	0.9	5.86	0.06	1063	14	1069	10	1073	13	1735	20	42.2	0.8	95.8399
2015KM4-069	0.15654	0.00164	10.3399	0.13379	0.47936	0.00617	0.12866	0.00102	0.9	0.42	0.01	2419	10	2466	12	2524	27	2446	18	72	1	101.233
2015KM4-070	0.06234	0.00155	0.90948	0.0232	0.10588	0.00148	0.03674	0.00097	0.9	6.05	0.06	686	31	657	12	649	9	729	19	142	2	99.8008
2015KM4-071	0.05711	0.00093	0.63764	0.0113	0.08104	0.00106	0.01931	0.00015	0.9	0.14	0.01	496	19	501	7	502	6	387	3	49.4	0.9	102.103
2015KM4-072	0.10693	0.00115	4.48125	0.05899	0.30416	0.0039	0.18779	0.00185	0.9	7.23	0.07	1748	11	1728	11	1712	19	3478	31	811	5	102.885
2015KM4-073	0.06626	0.00197	1.09105	0.03286	0.11952	0.00175	0.03702	0.00067	0.9	1.62	0.02	815	39	749	16	728	10	735	13	569	7	98.7678
2015KM4-074	0.07403	0.00106	1.81407	0.0291	0.17786	0.00233	0.05508	0.00053	0.9	1.22	0.01	1042	15	1051	10	1055	13	1084	10	1094	16	106.633
2015KM4-075	0.06541	0.00121	0.88385	0.01733	0.09808	0.00131	0.06867	0.00125	0.9	10.38	0.1	788	21	643	9	603	8	1342	24	89	2	99.8771
2015KM4-076	0.10008	0.00121	3.96058	0.0561	0.28725	0.00372	0.0878	0.00118	0.9	6.17	0.06	1626	12	1626	11	1628	19	1701	22	91.2	0.8	100
2015KM4-077	0.04769	0.00645	0.08821	0.01187	0.01343	0.00026	0.00445	0.00021	0.9	1.49	0.01	84	243	86	11	86	2	90	4	91.3	0.8	99.8056
2015KM4-078	0.07348	0.00095	1.75176	0.026	0.17305	0.00224	0.05923	0.00066	0.9	3.81	0.04	1027	13	1028	10	1029	12	1163	13	1053	30	102.289
2015KM4-079	0.07379	0.00133	1.63382	0.03149	0.16071	0.00213	0.01296	0.00137	0.9	9.26	0.09	1036	19	983	12	961	12	260	27	1095	30	103.986
2015KM4-080	0.06245	0.00188	0.80532	0.02452	0.09361	0.00137	0.03492	0.00063	0.9	1.91	0.02	690	40	600	14	577	8	694	12	37.7	0.3	99.7462
2015KM4-081	0.09725	0.00139	3.71014	0.05921	0.27692	0.00365	0.09114	0.0009	0.9	1.14	0.01	1572	14	1574	13	1576	18	1763	17	828	7	97.5891
2015KM4-082	0.06834	0.00081	1.50124	0.02099	0.15945	0.00204	0.05119	0.00075	0.9	13.62	0.14	879	13	931	9	954	11	1009	14	84	4	96.388
2015KM4-083	0.0676	0.00123	1.51009	0.02918	0.16216	0.00217	0.05224	0.00067	0.9	2.07	0.02	856	20	934	12	969	12	1029	13	46	1	100.249
2015KM4-084	0.06619	0.00109	1.20745	0.02158	0.13242	0.00174	0.0415	0.00065	0.9	4.67	0.05	812	18	804	10	802	10	822	13	74	2	103.303
2015KM4-085	0.06758	0.00143	1.15975	0.02554	0.12458	0.00169	0.04011	0.00048	0.9	1.22	0.01	856	24	782	12	757	10	795	9	42.3	1	100.914
2015KM4-086	0.05923	0.00119	0.72231	0.01522	0.08853	0.00118	0.02918	0.0004	0.9	2.46	0.02	576	24	552	9	547	7	581	8	887	6	103.448
2015KM4-087	0.06137	0.0031	0.75391	0.0378	0.08918	0.00152	0.0275	0.00046	0.9	0.56	0.01	652	78	570	22	551	9	548	9	54	4	100.503
2015KM4-088	0.1739	0.00201	11.8079	0.16136	0.4929	0.00642	0.14432	0.00163	0.9	2.57	0.03	2596	10	2589	13	2583	28	2725	29	88	3	104.942
2015KM4-089	0.14915	0.00299	8.48334	0.12933	0.41251	0.00535	0.11572	0.00149	0.92	2.91	0.03	2336	35	2284	14	2226	24	2213	27	2371	11	103.757
2015KM4-090	0.06166	0.00083	0.76989	0.01172	0.09065	0.00116	0.02438	0.00031	0.9	5.1	0.05	662	15	580	7	559	7	487	6	83.3	0.6	99.6364
2015KM4-091	0.05834	0.0018	0.71592	0.02235	0.08908	0.00127	0.02838	0.00034	0.9	0.64	0.01	543	43	548	13	550	8	566	7	90	1	102.969
2015KM4-092	0.0636	0.00175	0.9139	0.0255	0.10431	0.00147	0.03555	0.00067	0.9	2.49	0.02	728	36	659	14	640	9	706	13	91	3	100.845
2015KM4-093	0.0903	0.00145	3.06444	0.05338	0.24636	0.00327	0.07825	0.00076	0.9	0.83	0.01	1432	16	1424	13	1420	17	1523	14	102	5	100.458
2015KM4-094	0.0619	0.00121	0.91171	0.01873	0.10693	0.00142	0.03243	0.00037	0.9	1.3	0.01	671	23	658	10	655	8	645	7	78	1	83.054
2015KM4-096	0.10187	0.00135	4.1585	0.06249	0.29634	0.00382	0.08166	0.00079	0.9	1.21	0.01	1658	12	1666	12	1673	19	1587	15	48	2	99.1034
2015KM4-097	0.04823	0.00433	0.09762	0.00869	0.0147	0.00028	0.00496	0.00014	0.9	1.2	0.01	111	162	95	8	94	2	100	3	83	1	101.064
2015KM4-098	0.06691	0.0008	1.32545	0.01847	0.14381	0.00183	0.12996	0.00282	0.9	79.21	0.79	835	13	857	8	866	10	2470	50	86	4	98.9607
2015KM4-099	0.06622	0.0025	1.2092	0.04594	0.13257	0.00194	0.03355	0.00063	0.9	0.84	0.01	813	55	805	21	803	11	667	12	86	2	100.249
2015KM4-100	0.05782	0.00093	0.70106	0.01223	0.08803	0.00114	0.02773	0.00027	0.9	1.53	0.02	523	18	539	7	544	7	553	5	122	2	99.0809
Standards
PLE-01	0.05293	0.0012	0.39225	0.0094	0.05368	0.00075	0.01832	0.0006	0.9	8.15	0.08	326	30	336	7	337	5	367	12	337	5	99.7033
PLE-02	0.0547	0.00098	0.4055	0.00795	0.05372	0.00073	0.01982	0.00043	0.9	7.21	0.07	400	22	346	6	337	4	397	9	337	4	102.671
PLE-03	0.0551	0.00107	0.40783	0.00849	0.05365	0.00073	0.01676	0.00044	0.9	7.45	0.07	416	24	347	6	337	4	336	9	337	4	102.967
PLE-04	0.05224	0.0007	0.38672	0.006	0.05368	0.00071	0.01675	0.00024	0.9	8.59	0.09	296	16	332	4	337	4	336	5	337	4	98.5163
PLE-05	0.05395	0.0009	0.3989	0.00731	0.05363	0.00071	0.01614	0.00039	0.9	8.73	0.09	369	20	341	5	337	4	324	8	337	4	101.187
PLE-06	0.05304	0.00114	0.39258	0.00887	0.0537	0.00073	0.01498	0.00041	0.9	8.71	0.09	331	28	336	6	337	4	301	8	337	4	99.7033
PLE-07	0.05268	0.0009	0.39024	0.00722	0.05375	0.00071	0.01618	0.00031	0.9	8.16	0.08	315	20	335	5	338	4	324	6	338	4	99.1124
PLE-08	0.05278	0.00121	0.39051	0.00741	0.05367	0.00069	0.01683	0.00021	0.9	8.67	0.09	319	53	335	5	337	4	337	4	337	4	99.4065
PLE-09	0.05317	0.00119	0.39141	0.00719	0.05339	0.00068	0.01673	0.00021	0.9	8.87	0.09	336	52	335	5	335	4	335	4	335	4	100
PLE-10	0.05154	0.00083	0.38105	0.00669	0.05367	0.00069	0.01469	0.00033	0.9	9.55	0.1	265	19	328	5	337	4	295	7	337	4	97.3294
PLE-11	0.05189	0.00071	0.38384	0.00588	0.05371	0.00068	0.01598	0.00023	0.9	9.05	0.09	281	16	330	4	337	4	320	5	337	4	97.9228
